# Supplementary material for: Silver nanowires decorated with silver nanoparticles for low-haze flexible transparent conductive films
Source: PubMed Central journal article supplement (PMC4648094; doi:10.1038/srep16371), 2015-11-17
Supplement: srep16371-s1.pdf [file srep16371-s1.pdf]

# SUPPLEMENTARY INFORMATION

## **Silver nanowires decorated with silver nanoparticles for low-haze flexible transparent conductive films**

Mini Mol Menamparabath<sup>1,†</sup>, C. Muhammed Ajmal<sup>2,†</sup>, Kwang Hee Kim<sup>3</sup>, Daejin Yang<sup>3</sup>, Jongwook Roh<sup>3</sup>, Hyeon Cheol Park<sup>3</sup>, Chan Kwak<sup>3</sup>, Jae-Young Choi<sup>3,4,\*</sup>, Seunghyun Baik<sup>1,5,\*</sup>

<sup>1</sup> School of Mechanical Engineering, Sungkyunkwan University, Suwon 440-746, Republic of Korea

<sup>2</sup> Department of Energy Science, Sungkyunkwan University, Suwon 440-746, Republic of Korea

<sup>3</sup> Samsung Advanced Institute of Technology, Samsung Electronics, Suwon 443-803, Republic of Korea

<sup>4</sup> School of Advanced Materials Science & Engineering, Sungkyunkwan University, Suwon 440-746, Republic of Korea

<sup>5</sup> Center for Integrated Nanostructure Physics, Institute for Basic Science (IBS), Sungkyunkwan University, Suwon 440-746, Republic of Korea

<sup>†</sup> These authors contributed equally to this work.

### **Corresponding Authors**

**E-mail: jy.choi@skku.edu; sbaik@me.skku.ac.kr**

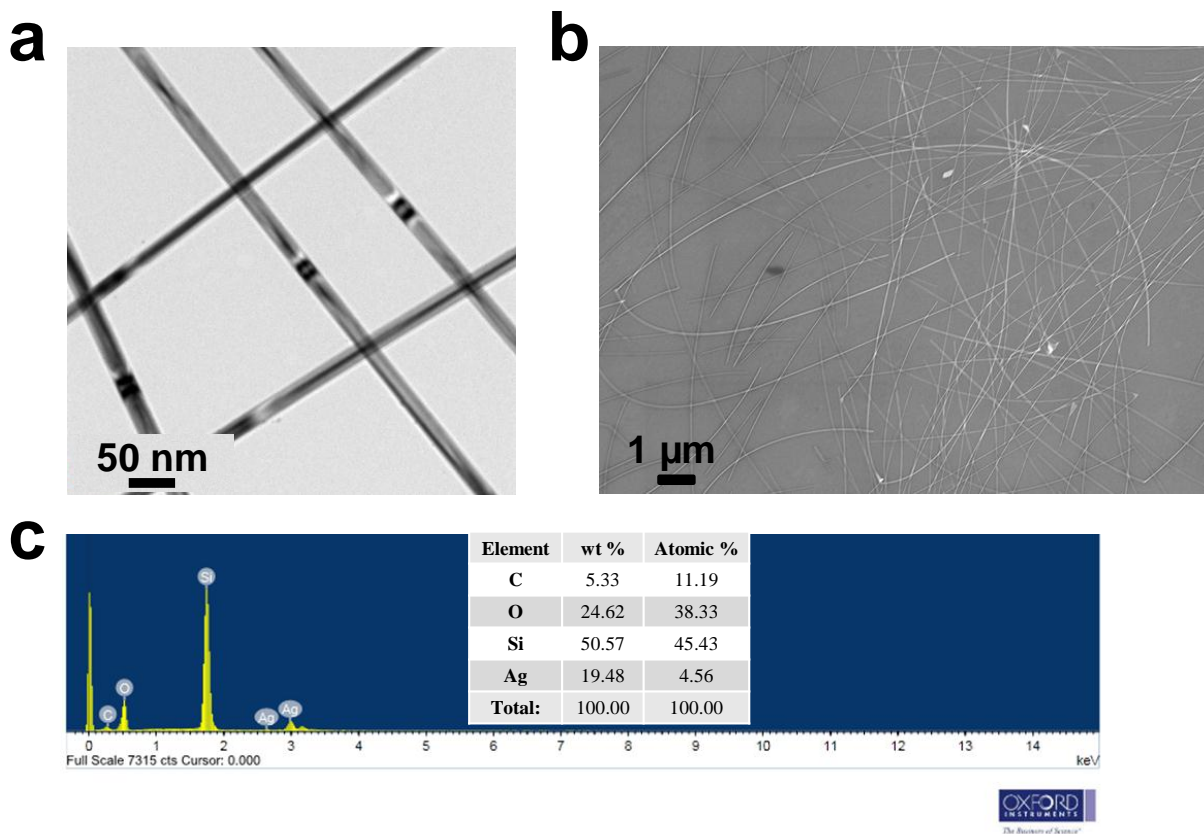

**Figure S1. HRTEM (a), SEM (b), and EDX (c) analyses of Ag NWs.** Carbon and oxygen peaks were observed due to the PVP covering around Ag NWs. Silicon and oxygen peaks came from the Si/SiO<sub>2</sub> substrate.

| Vibration mode                                           | Wavenumber (cm <sup>-1</sup> ) |
|----------------------------------------------------------|--------------------------------|
| N-H stretch <sup>s1</sup>                                | 3018                           |
| S-H stretch <sup>s1</sup>                                | 2497                           |
| CH <sub>2</sub> stretch <sup>s2</sup>                    | 2918, 2850                     |
| CH <sub>2</sub> deformation <sup>s2</sup>                | 1384–1393                      |
| C–C stretch <sup>s2</sup>                                | 1200                           |
| NH <sub>2</sub> deformation <sup>s3</sup>                | 1587                           |
| CH <sub>2</sub> wagging deformation <sup>s3</sup>        | 1247                           |
| C=O stretch <sup>s3</sup>                                | 1670                           |
| coupled –CH <sub>2</sub> deformation <sup>s3</sup>       | 1495, 1325                     |
| Ag-S (Ag NP and capping agent interaction) <sup>s4</sup> | 1372                           |
| O-H group <sup>s4</sup>                                  | 3200                           |
| C-N stretch <sup>s5</sup>                                | 1071                           |
| O-H group <sup>s5</sup>                                  | 3347                           |

**Table S1. Vibrational mode assignment in FTIR analysis.**

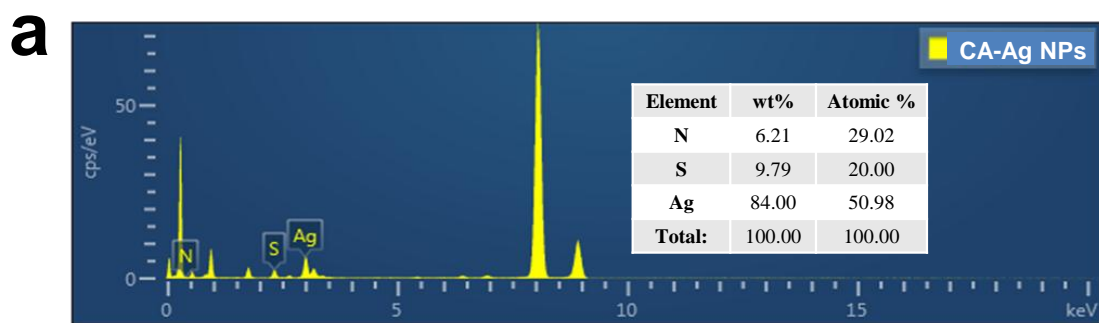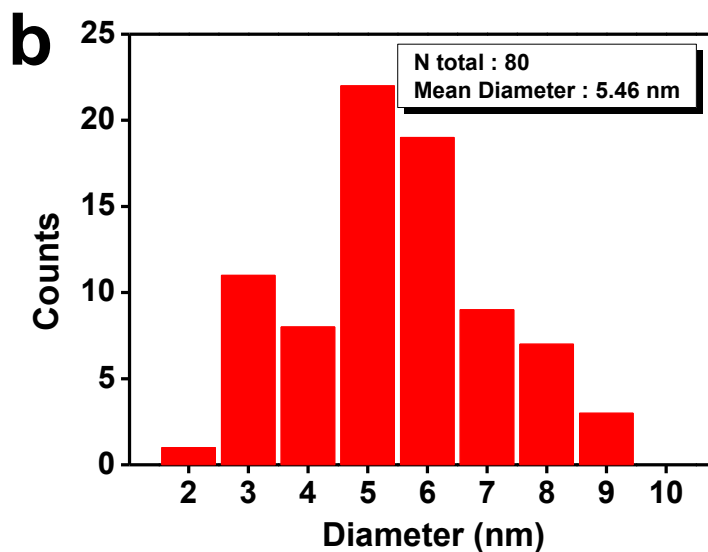

**Figure S2. HRTEM analysis of CA-Ag NPs.** (a) EDX analysis from scanning transmission electron microscopy (JOEL, JEM-2100F) indicated the presence of Ag, N, and S elements. Carbon was excluded in the atomic composition analysis due to the interference with a lacey carbon TEM grid. (b) Diameter distribution of CA-Ag NPs obtained from HRTEM images.

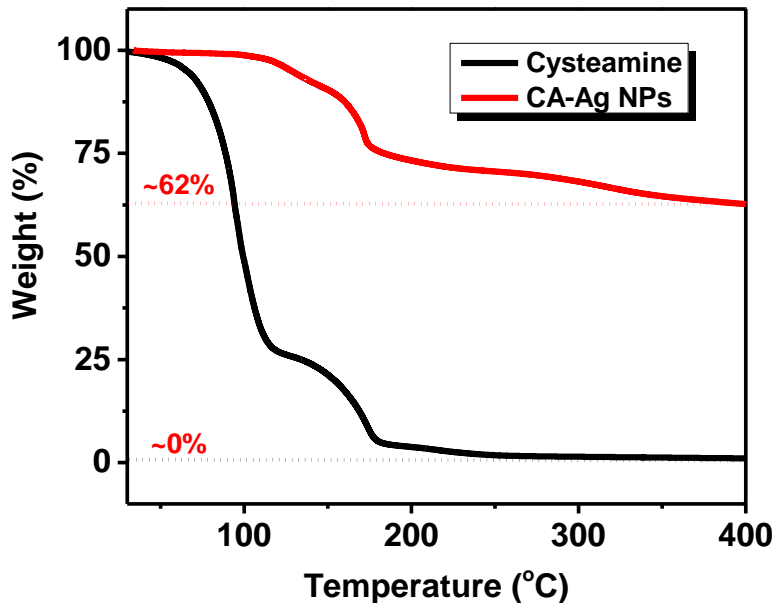

**Figure S3. Thermogravimetric analysis of pure cysteamine and CA-Ag NPs.** CA-Ag NP powders were firstly obtained by centrifuging suspended CA-Ag NPs in ethanol and drying in vacuum oven (room temperature) for 12 h. The thermogravimetric analysis was then carried out using dried CA-Ag NP powders. The concentrations of cysteamine and  $\text{AgNO}_3$  were  $6 \times 10^{-5}$  and  $2 \times 10^{-2}$  moles in the synthesis solution of CA-Ag NPs, and the theoretical weight ratio between Ag and cysteamine was 58:42%. The remaining weight concentration of CA-Ag NPs at 400 °C was 62% from thermogravimetric analysis. The 38% weight loss corresponds to the dissociation of cysteamine. A complete dissociation of pure cysteamine was observed at 400 °C.

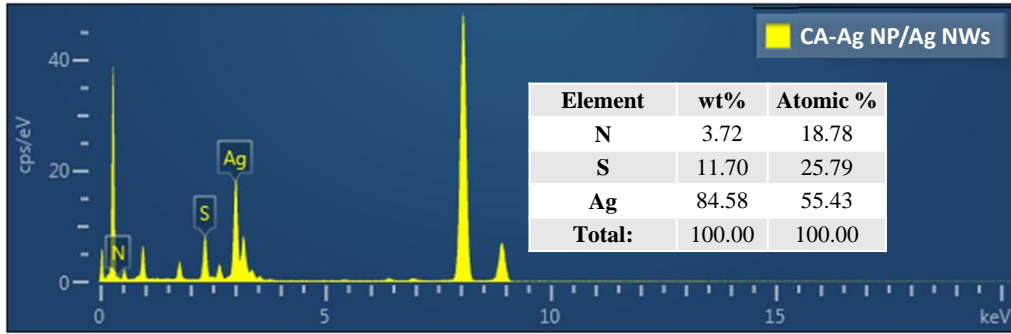

**Figure S4. Scanning transmission electron microscopy (JOEL, JEM-2100F) analysis of CA-Ag NPs attached to Ag NWs. EDX analysis indicated the presence of Ag, N, and S elements.**

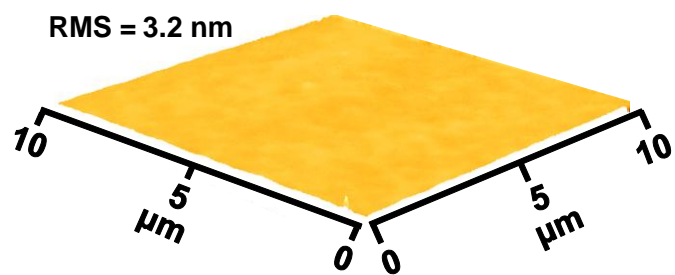

**Figure S5.** The surface roughness of the PC substrate measured by atomic force microscopy.

| Relative weight concentration of CA-Ag NPs over Ag NWs (w/w%) | Curing Temp. (°C) | Sheet resistance (Ω/sq) | Sheet resistance Std. Dev. | Transmittance (%) | Transmittance Std. Dev. | Haze (%) | Haze Std. Dev. |
|---------------------------------------------------------------|-------------------|-------------------------|----------------------------|-------------------|-------------------------|----------|----------------|
| 0                                                             | 85                | 34.2                    | 1.90                       | 96.5              | 0.19                    | 0.96     | 0.03           |
|                                                               | 110               | 32.0                    | 1.44                       | 96.6              | 0.35                    | 1.04     | 0.03           |
|                                                               | 130               | 31.4                    | 1.50                       | 96.4              | 0.25                    | 1.03     | 0.09           |
|                                                               | 160               | 32.2                    | 1.66                       | 96.5              | 0.11                    | 1.04     | 0.04           |
| 0.04                                                          | 85                | 28.4                    | 5.68                       | 96.5              | 0.15                    | 1.09     | 0.04           |
|                                                               | 110               | 30.5                    | 2.36                       | 96.4              | 0.12                    | 1.22     | 0.03           |
|                                                               | 130               | 27.4                    | 2.42                       | 96.6              | 0.19                    | 1.14     | 0.07           |
|                                                               | 160               | 31.4                    | 7.70                       | 96.4              | 0.21                    | 1.18     | 0.08           |
| 0.08                                                          | 85                | 26.5                    | 3.57                       | 96.4              | 0.20                    | 0.98     | 0.04           |
|                                                               | 110               | 26.4                    | 2.38                       | 96.3              | 0.09                    | 1.16     | 0.05           |
|                                                               | 130               | 26.1                    | 2.02                       | 95.6              | 0.24                    | 1.13     | 0.11           |
|                                                               | 160               | 29.5                    | 6.03                       | 95.2              | 0.15                    | 1.20     | 0.12           |
| 0.16                                                          | 85                | 24.1                    | 0.80                       | 96.4              | 0.09                    | 1.04     | 0.05           |
|                                                               | 110               | 24.9                    | 1.54                       | 96.5              | 0.07                    | 1.04     | 0.04           |
|                                                               | 130               | 25.6                    | 1.81                       | 96.1              | 0.25                    | 1.17     | 0.28           |
|                                                               | 160               | 27.2                    | 3.75                       | 95.5              | 0.25                    | 1.19     | 0.30           |
| 0.32                                                          | 85                | 26.4                    | 3.40                       | 96.2              | 0.13                    | 1.00     | 0.04           |
|                                                               | 110               | 28.0                    | 2.43                       | 96.0              | 0.23                    | 1.00     | 0.08           |
|                                                               | 130               | 56.6                    | 5.62                       | 95.3              | 0.50                    | 1.39     | 0.30           |
|                                                               | 160               | Out of range            | -                          | 94.5              | 0.52                    | 1.60     | 0.35           |
| 0.65                                                          | 85                | 31.0                    | 3.53                       | 95.9              | 0.11                    | 1.16     | 0.02           |
|                                                               | 110               | 34.4                    | 5.80                       | 96.0              | 0.09                    | 1.24     | 0.10           |
|                                                               | 130               | 111.6                   | 6.78                       | 94.6              | 0.55                    | 2.31     | 0.35           |
|                                                               | 160               | Out of range            | -                          | 94.1              | 0.71                    | 2.50     | 0.50           |

**Table S2. Sheet resistance, transmittance, and haze of TCFs corresponding to the data in Fig. 3b.** Sheet resistance was measured at 27 different locations of each sample. Transmittance and haze were measured at 9 different locations of each sample. The mean values and standard deviations (Std. Dev.) are provided.



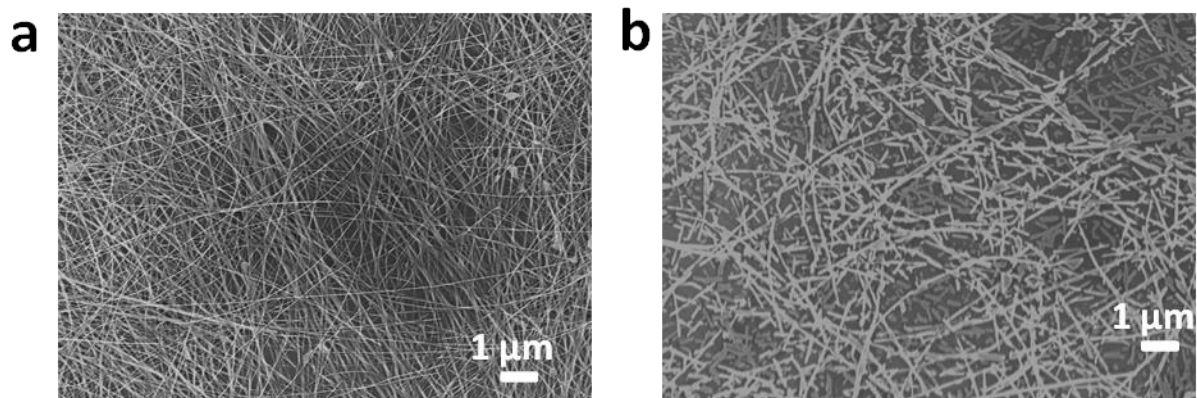

**Figure S6. SEM images of pure Ag NWs (a) and cysteamine-added Ag NWs (b) heat-treated at 160 °C on Si/SiO<sub>2</sub> substrates. The cysteamine concentration was  $6 \times 10^{-5}$  moles.**

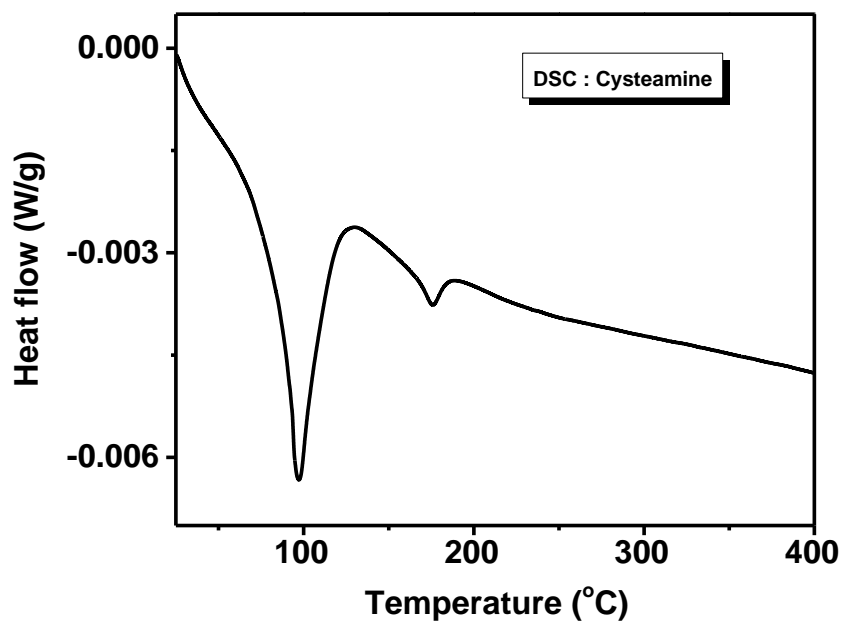

**Figure S7. Differential scanning calorimetry analysis of pure cysteamine.** Endothermic peaks at 97 and 175 °C indicate melting and dissociation of cysteamine.

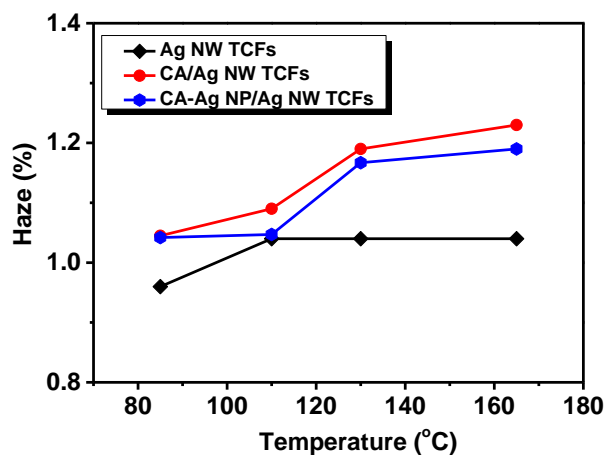

**Figure S8. Haze of TCFs made using pure Ag NWs, cysteamine-added Ag NWs, and CA-Ag NP/Ag NWs cured at different temperatures.** The cysteamine concentration was  $6 \times 10^{-5}$  moles. The relative concentration of CA-Ag NPs over Ag NWs was 0.16 w/w% for CA-Ag NP/Ag NWs.

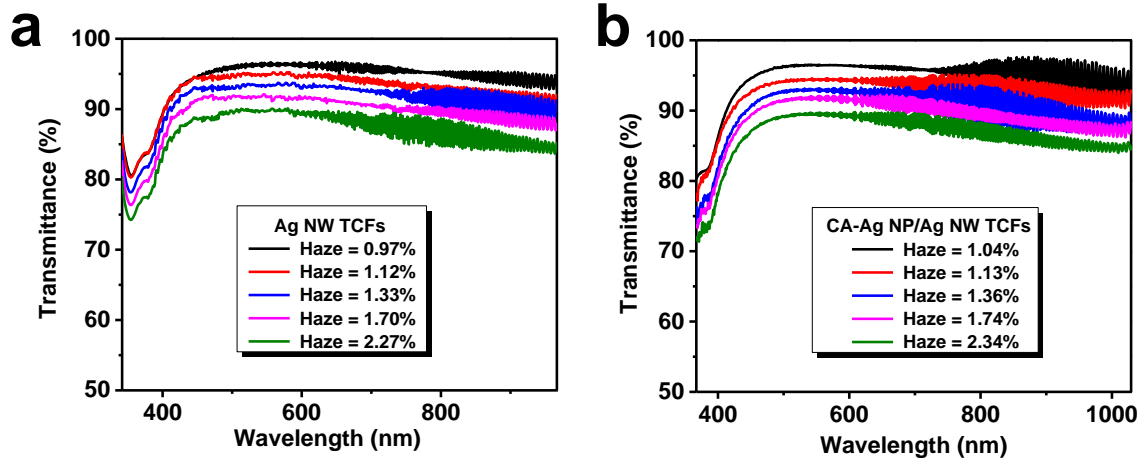

**Figure S9.** The UV-Vis-NIR transmittance spectra of TCFs shown in Figs. 3e and 3f. (a) Ag NW TCFs. (b) CA-Ag NP/Ag NW TCFs.

| Conductive material            | Sheet resistance ( $\Omega/\text{sq}$ ) | Transmittance (%) | Haze (%) | Ag NW Length              | Ag NW Diameter | Fabrication                    |                     |     |
|--------------------------------|-----------------------------------------|-------------------|----------|---------------------------|----------------|--------------------------------|---------------------|-----|
|                                |                                         |                   |          |                           |                | Method                         | Annealing condition |     |
| CA-Ag NP/Ag NWs<br>(This work) | 24.1                                    | 96.4              | 1.04     | 18 $\mu\text{m}$          | 20 nm          | Bar coating                    | 85 °C for 10 min    |     |
|                                | 21.3                                    | 95.00             | 1.13     |                           |                |                                |                     |     |
|                                | 17.0                                    | 93.57             | 1.36     |                           |                |                                |                     |     |
|                                | 13.9                                    | 92.15             | 1.74     |                           |                |                                |                     |     |
|                                | 11.5                                    | 90.38             | 2.34     |                           |                |                                |                     |     |
| Ag NWs <sup>s6</sup>           | 21                                      | 76                | 10       | 10 $\mu\text{m}$          | 40-100 nm      | Bar coating                    | 120 °C              |     |
|                                | 38                                      | 81                |          |                           |                |                                |                     |     |
|                                | 110                                     | 92                |          |                           |                |                                |                     |     |
| Ag NWs <sup>s7</sup>           | 24                                      | 97                | 3.4      | 20-230 $\mu\text{m}$      | 91 nm          | Drop coating                   | 200 °C for 10 min   |     |
|                                | 109                                     | 94                |          |                           |                |                                |                     | 1.6 |
| Ag NWs <sup>s8</sup>           | 24.8                                    | 92.9              | 2.7      | NA                        | NA             | Bar coating                    | 140 °C for 4 min    |     |
| Ag NWs <sup>s9</sup>           | 12.7                                    | 92.5              | NA       | Few tens of $\mu\text{m}$ | 25 nm          | Spin coating                   | 120 °C for 5 min    |     |
|                                | 14.1                                    | 93.9              |          |                           |                |                                |                     |     |
|                                | 22.5                                    | 96.9              |          |                           |                |                                |                     |     |
|                                | 26.8                                    | 97.3              |          |                           |                |                                |                     |     |
|                                | 27.6                                    | 97.5              |          |                           |                |                                |                     |     |
| Ag NWs <sup>s10</sup>          | 59                                      | 97                | 2.5      | 13.5 $\mu\text{m}$        | 62.5 nm        | Electrostatic spray deposition | 120 °C for 8 hours  |     |
|                                | 20                                      | 92.1              |          |                           |                |                                |                     | 4.9 |
|                                | 11                                      | 87                |          |                           |                |                                |                     | 7.5 |
| Ag NWs <sup>s11</sup>          | 35                                      | 74.8              | 31       | 20 $\mu\text{m}$          | 150 nm         | Vacuum filtration              | Room temperature    |     |
|                                | 45                                      | 77                | 12.5     | 25 $\mu\text{m}$          | 60 nm          |                                |                     |     |

**Table S3. The properties of TCFs made using Ag NWs were compared.**

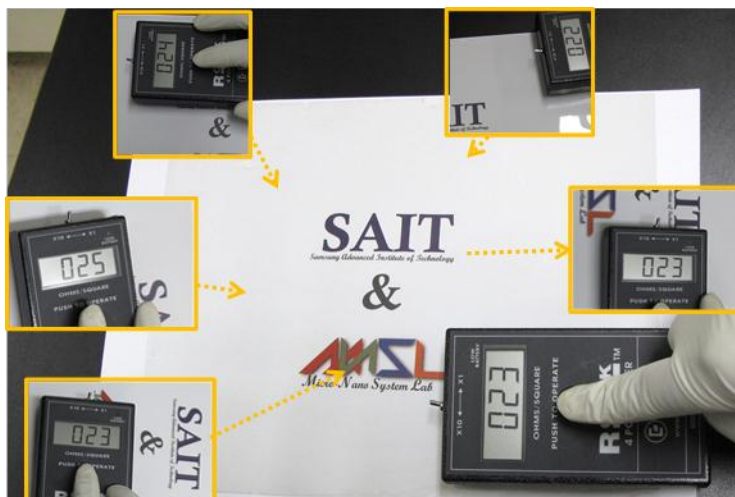

**Figure S10. Visual demonstration of uniform sheet resistance of the CA-Ag NP/Ag NW TCF ( $25 \times 20 \text{ cm}^2$ ) after the protective layer coating.** The logos used in the figure were reproduced with permission from Samsung electronics and Sungkyunkwan University.

## References

- s1 Zhou, H., Wang, X., Yu, P., Chen, X. & Mao, L. Sensitive and selective voltammetric measurement of Hg<sup>2+</sup> by rational covalent functionalization of graphene oxide with cysteamine. *Analyst* **137**, 305-308 (2012).
- s2 Menendez, G. O. *et al.* Self-assembly of thiolated cyanine aggregates on Au(111) and Au nanoparticle surfaces. *Nanoscale* **4**, 531-540 (2012).
- s3 Aina, V. *et al.* Novel bio-conjugate materials: soybean peroxidase immobilized on bioactive glasses containing Au nanoparticles. *J. Mater. Chem* **21**, 10970-10981 (2011).
- s4 Kundu, S. & Nithiyantham, U. In situ formation of curcumin stabilized shape-selective Ag nanostructures in aqueous solution and their pronounced SERS activity. *RSC Adv.* **3**, 25278-25290 (2013).
- s5 Rajesh, K. G., Vinayak, A. D., Gosavi, S. W., Rishi, B. S. & Suwarna, S. D. Catalytic activity of allamanda mediated phytosynthesized anisotropic gold nanoparticles. *Adv. Nat. Sci: Nanosci. Nanotechnol.* **4**, 045005 (2013).
- s6 Hu, L., Kim, H. S., Lee, J.-Y., Peumans, P. & Cui, Y. Scalable Coating and Properties of Transparent, Flexible, Silver Nanowire Electrodes. *ACS Nano* **4**, 2955-2963 (2010).
- s7 Araki, T. *et al.* Low haze transparent electrodes and highly conducting air dried films with ultra-long silver nanowires synthesized by one-step polyol method. *Nano Res.* **7**, 236-245 (2014).
- s8 Moon, I. K. *et al.* 2D Graphene Oxide Nanosheets as an Adhesive Over-Coating Layer for Flexible Transparent Conductive Electrodes. *Scientific Rep.* **3**, 1112 (2013).
- s9 Song, M. *et al.* Highly Efficient and Bendable Organic Solar Cells with Solution-Processed Silver Nanowire Electrodes. *Adv. Funct. Mater.* **23**, 4177-4184 (2013).
- s10 Kim, T. *et al.* Electrostatic Spray Deposition of Highly Transparent Silver Nanowire Electrode on Flexible Substrate. *ACS Appl. Mater. Interfaces* **5**, 788-794 (2013).
- s11 Preston, C., Xu, Y., Han, X., Munday, J. & Hu, L. Optical haze of transparent and conductive silver nanowire films. *Nano Res.* **6**, 461-468 (2013).
